# Supplementary material
Source: MDPI journal article supplement (https://www.mdpi.com/1999-4907/12/10/1411)
Supplement: s1 [file s1]

**Table S1.** *T*-test of the relative abundance of dominant bacterial phyla and classes.

|        | <b>Taxonomy</b>     | <b>CK</b>   | <b>CTM</b>  |
|--------|---------------------|-------------|-------------|
| Phylum | Proteobacteria      | 34.52±4.54a | 26.74±0.13b |
|        | Actinobacteria      | 24.13±2.82a | 20.10±0.41a |
|        | Acidobacteria       | 14.89±2.96a | 18.43±1.06a |
|        | Verrucomicrobia     | 6.75±0.69b  | 12.03±1.32a |
|        | Chloroflexi         | 7.70±0.76b  | 10.76±0.72a |
|        | Bacteroidetes       | 3.20±0.31a  | 2.55±0.07a  |
|        | Gemmatimonadetes    | 3.01±0.43a  | 2.34±0.17a  |
|        | Rokubacteria        | 1.61±0.15a  | 1.99±0.12a  |
|        | Planctomycetes      | 1.31±0.17a  | 1.73±0.33a  |
|        | Patescibacteria     | 1.03±0.09a  | 0.89±0.06a  |
|        | others              | 1.86±0.21a  | 2.44±0.12a  |
| Class  | Actinobacteria      | 24.13±2.82a | 20.10±0.41a |
|        | Alphaproteobacteria | 23.90±3.14a | 17.79±0.42b |
|        | Verrucomicrobiae    | 6.75±0.69b  | 12.03±1.32a |
|        | Gammaproteobacteria | 7.49±1.01a  | 6.14±0.45a  |
|        | Subgroup_6          | 5.29±0.70a  | 5.61±0.16a  |
|        | Acidobacteriia      | 4.75±0.08a  | 5.93±0.65a  |
|        | KD4-96              | 3.59±0.68a  | 4.59±0.38a  |
|        | Blastocatellia      | 3.14±0.20a  | 4.70±0.21a  |
|        | Deltaproteobacteria | 3.12±0.49a  | 2.81±0.09a  |
|        | Bacteroidia         | 3.16±0.31a  | 2.48±0.08a  |
|        | Gemmatimonadetes    | 3.01±0.43a  | 2.34±0.17a  |
|        | NC10                | 1.61±0.15a  | 1.99±0.12a  |
|        | Anaerolineae        | 0.79±0.16b  | 1.42±0.17a  |
|        | AD3                 | 0.82±0.05b  | 1.32±0.14a  |
|        | Planctomycetacia    | 0.91±0.08a  | 1.19±0.16a  |
|        | TK10                | 0.83±0.04a  | 0.92±0.06a  |
|        | Holophagae          | 0.78±0.03a  | 0.90±0.08a  |
|        | others              | 5.92±0.49a  | 7.75±0.19a  |

**Table S2.** *T*-test of the relative abundance of dominant fungal phyla and classes.

|        | <b>Taxonomy</b>                   | <b>CK</b>   | <b>CTM</b>  |
|--------|-----------------------------------|-------------|-------------|
| Phylum | Basidiomycota                     | 67.69±0.57a | 40.06±5.26b |
|        | Ascomycota                        | 28.36±0.68b | 46.43±1.99a |
|        | unclassified_k_Fungi              | 1.29±0.32a  | 7.22±1.46a  |
|        | Mortierellomycota                 | 1.26±0.22b  | 3.51±0.20a  |
|        | Rozellomycota                     | 0.52±0.01b  | 1.56±0.21a  |
|        | Mucoromycota                      | 0.84±0.22a  | 0.61±0.08a  |
|        | Blastocladiomycota                | 0.04±0.01a  | 0.56±0.09a  |
|        | others                            | 0.02±0.01b  | 0.05±0.01a  |
| Class  | Agaricomycetes                    | 65.52±1.00a | 37.14±5.63b |
|        | Leotiomycetes                     | 13.81±0.75a | 17.96±1.57a |
|        | Pezizomycetes                     | 4.24±0.48b  | 10.66±0.90a |
|        | unclassified_k_Fungi              | 1.29±0.32b  | 7.22±0.46a  |
|        | Sordariomycetes                   | 2.85±0.07b  | 5.41±0.33a  |
|        | Pezizomycotina_cls_Incertae_sedis | 3.01±0.31b  | 4.76±0.47a  |

|                                   |            |            |
|-----------------------------------|------------|------------|
| Mortierellomycetes                | 1.25±0.22b | 3.50±0.20a |
| Tremellomycetes                   | 1.83±0.43a | 2.27±0.47a |
| Dothideomycetes                   | 1.94±0.26a | 1.94±0.27a |
| unclassified_p_Ascomycota         | 0.47±0.01b | 2.93±0.25a |
| Eurotiomycetes                    | 0.88±0.09b | 1.30±0.14a |
| unclassified_p_Rozellomycota      | 0.48±0.01b | 1.36±0.21a |
| Umbelopsidomycetes                | 0.81±0.22a | 0.53±0.09a |
| unclassified_p_Blastocladiomycota | 0.01±0.01b | 0.51±0.09a |
| others                            | 1.61±0.05b | 2.52±0.20a |

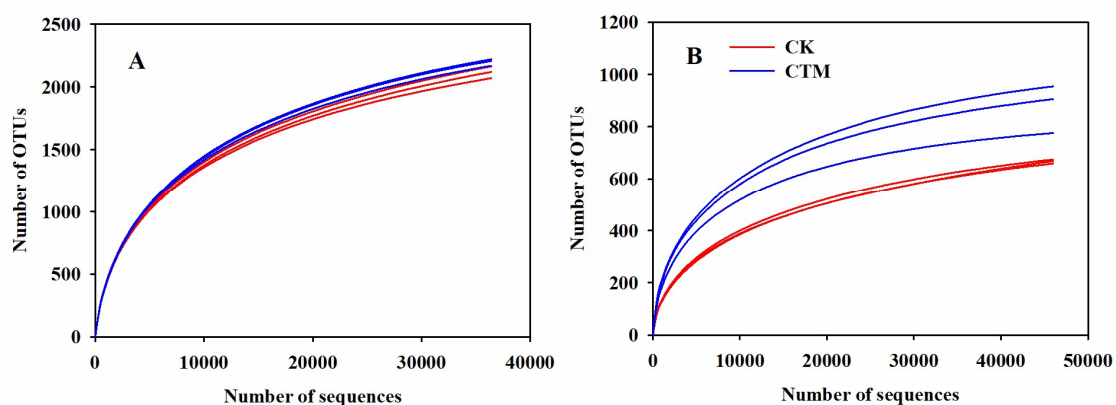

**Figure S1.** Rarefaction curves of the number of operational taxonomic units (OTUs) for soil bacterial (A) and fungal (B) communities at 97% sequence similarity. CTM, Crop tree management.
